# Supplementary material for: Perceptions of a Specific Family Communication Application among Grandparents and Grandchildren: An Extension of the Technology Acceptance Model
Source: PubMed Central journal article supplement (PMC4896451; doi:10.1371/journal.pone.0156680), 2016-06-07
Supplement: pone.0156680.s002.pdf [file pone.0156680.s002.pdf]

| 編號      | Gender | Age | Education Level | SMS Experience | N1 | N2 |   |
|---------|--------|-----|-----------------|----------------|----|----|---|
| YOUNG1  | Male   | 24  | Graduate school | Yes            |    | 4  | 3 |
| YOUNG2  | Female | 24  | Graduate school | Yes            |    | 4  | 4 |
| YOUNG3  | Female | 24  | Graduate school | Yes            |    | 5  | 4 |
| YOUNG4  | Male   | 24  | Graduate school | Yes            |    | 5  | 5 |
| YOUNG5  | Female | 25  | Graduate school | Yes            |    | 4  | 5 |
| YOUNG6  | Female | 25  | College         | Yes            |    | 5  | 4 |
| YOUNG7  | Female | 24  | Graduate school | Yes            |    | 4  | 4 |
| YOUNG8  | Female | 24  | Graduate school | Yes            |    | 5  | 5 |
| YOUNG9  | Male   | 24  | Graduate school | Yes            |    | 4  | 5 |
| YOUNG10 | Male   | 24  | Graduate school | Yes            |    | 5  | 5 |
| YOUNG11 | Male   | 24  | Graduate school | Yes            |    | 5  | 5 |
| YOUNG12 | Female | 30  | Graduate school | Yes            |    | 5  | 5 |
| YOUNG13 | Male   | 25  | Graduate school | Yes            |    | 5  | 4 |
| YOUNG14 | Female | 24  | Graduate school | Yes            |    | 3  | 4 |
| YOUNG15 | Female | 25  | Graduate school | Yes            |    | 4  | 4 |
| YOUNG16 | Male   | 25  | Graduate school | Yes            |    | 4  | 4 |
| YOUNG17 | Female | 24  | Graduate school | Yes            |    | 5  | 5 |
| YOUNG18 | Male   | 24  | Graduate school | Yes            |    | 4  | 5 |
| YOUNG19 | Female | 24  | College         | Yes            |    | 5  | 5 |
| YOUNG20 | Female | 24  | College         | Yes            |    | 3  | 2 |
| YOUNG21 | Male   | 25  | Graduate school | Yes            |    | 3  | 5 |
| YOUNG22 | Female | 24  | Graduate school | Yes            |    | 4  | 4 |
| YOUNG23 | Male   | 24  | Graduate school | Yes            |    | 4  | 3 |
| YOUNG24 | Male   | 24  | Graduate school | Yes            |    | 4  | 4 |
| YOUNG25 | Female | 24  | Graduate school | Yes            |    | 5  | 5 |
| YOUNG26 | Female | 24  | Graduate school | Yes            |    | 5  | 5 |
| YOUNG27 | Male   | 24  | College         | Yes            |    | 5  | 5 |
| YOUNG28 | Male   | 25  | Graduate school | Yes            |    | 5  | 5 |
| YOUNG29 | Male   | 24  | College         | Yes            |    | 5  | 4 |
| YOUNG30 | Male   | 25  | Graduate school | Yes            |    | 5  | 4 |
| YOUNG31 | Male   | 24  | College         | Yes            |    | 3  | 4 |
| YOUNG32 | Female | 24  | College         | Yes            |    | 4  | 4 |
| YOUNG33 | Male   | 24  | College         | Yes            |    | 5  | 5 |
| YOUNG34 | Female | 24  | College         | Yes            |    | 5  | 5 |
| YOUNG35 | Female | 24  | College         | Yes            |    | 5  | 5 |
| YOUNG36 | Male   | 24  | College         | Yes            |    | 5  | 5 |
| YOUNG37 | Female | 24  | College         | Yes            |    | 5  | 4 |
| YOUNG38 | Male   | 24  | College         | Yes            |    | 4  | 4 |
| YOUNG39 | Male   | 24  | College         | Yes            |    | 5  | 5 |
| OLD1    | Female | 63  | Elementary      | No             |    | 4  | 3 |
| OLD2    | Female | 71  | Elementary      | No             |    | 5  | 4 |
| OLD3    | Female | 70  | Senior High     | No             |    | 4  | 5 |
| OLD4    | Female | 74  | Junior High     | Yes            |    | 5  | 4 |
| OLD5    | Male   | 72  | College         | No             |    | 5  | 5 |
| OLD6    | Male   | 69  | Senior High     | Yes            |    | 5  | 5 |
| OLD7    | Female | 70  | Senior High     | Yes            |    | 5  | 5 |
| OLD8    | Female | 67  | College         | No             |    | 4  | 4 |

|       |        |    |                 |     |   |   |
|-------|--------|----|-----------------|-----|---|---|
| OLD9  | Female | 68 | Senior High     | Yes | 5 | 5 |
| OLD10 | Male   | 71 | College         | Yes | 5 | 5 |
| OLD11 | Female | 66 | Graduate school | No  | 5 | 5 |
| OLD12 | Male   | 69 | Elementary      | No  | 4 | 4 |
| OLD13 | Female | 66 | Senior High     | No  | 4 | 4 |
| OLD14 | Female | 86 | Senior High     | No  | 4 | 4 |
| OLD15 | Female | 63 | Senior High     | No  | 4 | 4 |
| OLD16 | Female | 62 | College         | No  | 5 | 5 |
| OLD17 | Female | 64 | College         | No  | 4 | 4 |
| OLD18 | Male   | 69 | Senior High     | Yes | 4 | 4 |
| OLD19 | Female | 68 | Senior High     | No  | 4 | 5 |
| OLD20 | Female | 66 | College         | No  | 5 | 4 |
| OLD21 | Female | 66 | Elementary      | No  | 5 | 5 |
| OLD22 | Male   | 64 | Senior High     | No  | 4 | 5 |
| OLD23 | Male   | 66 | Senior High     | No  | 4 | 4 |
| OLD24 | Male   | 72 | Senior High     | No  | 5 | 4 |
| OLD25 | Male   | 68 | Senior High     | No  | 5 | 5 |
| OLD26 | Male   | 86 | College         | No  | 4 | 4 |
| OLD27 | Male   | 76 | College         | No  | 4 | 4 |
| OLD28 | Female | 71 | Elementary      | No  | 3 | 3 |
| OLD29 | Female | 72 | College         | No  | 5 | 4 |
| OLD30 | Female | 69 | Junior High     | No  | 5 | 5 |
| OLD31 | Female | 79 | Elementary      | No  | 5 | 3 |
| OLD32 | Female | 73 | Elementary      | No  | 3 | 4 |
| OLD33 | Female | 68 | Senior High     | No  | 4 | 4 |
| OLD34 | Female | 67 | Junior High     | No  | 5 | 5 |
| OLD35 | Female | 68 | Elementary      | No  | 5 | 4 |
| OLD36 | Female | 65 | College         | No  | 5 | 5 |
| OLD37 | Male   | 74 | College         | Yes | 5 | 5 |
| OLD38 | Female | 64 | College         | Yes | 5 | 5 |
| OLD39 | Female | 78 | Elementary      | No  | 5 | 5 |



|   |   |   |   |   |   |   |   |   |
|---|---|---|---|---|---|---|---|---|
| 5 | 5 | 5 | 4 | 5 | 5 | 5 | 5 | 5 |
| 5 | 5 | 5 | 4 | 5 | 5 | 5 | 5 | 5 |
| 5 | 5 | 5 | 5 | 5 | 5 | 5 | 5 | 5 |
| 4 | 3 | 3 | 3 | 4 | 4 | 4 | 4 | 4 |
| 4 | 5 | 5 | 5 | 4 | 4 | 4 | 4 | 4 |
| 4 | 5 | 5 | 5 | 5 | 5 | 5 | 5 | 5 |
| 4 | 4 | 4 | 4 | 4 | 4 | 4 | 4 | 4 |
| 5 | 5 | 5 | 4 | 5 | 4 | 5 | 4 | 4 |
| 4 | 4 | 4 | 4 | 4 | 4 | 4 | 4 | 4 |
| 4 | 5 | 5 | 5 | 5 | 5 | 5 | 5 | 5 |
| 4 | 5 | 5 | 5 | 5 | 5 | 5 | 5 | 5 |
| 5 | 5 | 5 | 5 | 5 | 5 | 5 | 5 | 5 |
| 5 | 5 | 5 | 5 | 3 | 4 | 3 | 4 | 4 |
| 4 | 5 | 5 | 5 | 5 | 5 | 5 | 5 | 3 |
| 4 | 5 | 5 | 5 | 5 | 5 | 5 | 5 | 5 |
| 5 | 5 | 5 | 5 | 5 | 5 | 5 | 5 | 5 |
| 4 | 5 | 5 | 5 | 5 | 5 | 5 | 5 | 5 |
| 4 | 5 | 5 | 5 | 5 | 5 | 5 | 5 | 5 |
| 3 | 4 | 4 | 4 | 4 | 4 | 4 | 4 | 4 |
| 5 | 4 | 5 | 5 | 5 | 5 | 5 | 5 | 5 |
| 5 | 4 | 4 | 4 | 4 | 4 | 4 | 4 | 4 |
| 4 | 4 | 4 | 4 | 4 | 4 | 4 | 4 | 4 |
| 4 | 4 | 4 | 4 | 4 | 4 | 4 | 4 | 4 |
| 5 | 2 | 4 | 4 | 5 | 5 | 5 | 5 | 5 |
| 5 | 5 | 5 | 4 | 5 | 5 | 5 | 5 | 5 |
| 4 | 4 | 4 | 4 | 4 | 4 | 4 | 4 | 3 |
| 5 | 4 | 4 | 5 | 5 | 5 | 5 | 5 | 5 |
| 4 | 4 | 4 | 4 | 4 | 4 | 4 | 4 | 4 |
| 5 | 4 | 4 | 5 | 4 | 4 | 4 | 4 | 4 |
| 5 | 5 | 5 | 4 | 5 | 5 | 5 | 5 | 5 |



|   |   |   |   |   |   |   |   |   |
|---|---|---|---|---|---|---|---|---|
| 3 | 4 | 4 | 5 | 5 | 5 | 5 | 5 | 5 |
| 4 | 4 | 4 | 5 | 4 | 5 | 5 | 4 | 4 |
| 5 | 5 | 5 | 5 | 5 | 5 | 5 | 5 | 5 |
| 4 | 4 | 4 | 3 | 3 | 3 | 4 | 4 | 4 |
| 4 | 4 | 4 | 4 | 4 | 4 | 4 | 4 | 4 |
| 5 | 5 | 5 | 5 | 5 | 5 | 5 | 5 | 5 |
| 2 | 3 | 3 | 4 | 3 | 4 | 4 | 4 | 4 |
| 5 | 4 | 4 | 5 | 5 | 5 | 5 | 5 | 5 |
| 3 | 3 | 3 | 4 | 4 | 4 | 4 | 4 | 4 |
| 4 | 4 | 4 | 4 | 4 | 4 | 5 | 5 | 5 |
| 5 | 5 | 5 | 5 | 4 | 4 | 5 | 5 | 5 |
| 4 | 3 | 3 | 5 | 5 | 5 | 4 | 4 | 4 |
| 4 | 4 | 4 | 3 | 3 | 2 | 4 | 4 | 4 |
| 5 | 5 | 5 | 3 | 5 | 5 | 2 | 5 | 5 |
| 4 | 4 | 4 | 5 | 5 | 5 | 5 | 5 | 4 |
| 5 | 5 | 4 | 5 | 5 | 5 | 5 | 5 | 5 |
| 5 | 4 | 4 | 4 | 4 | 4 | 5 | 5 | 5 |
| 5 | 5 | 5 | 5 | 3 | 5 | 5 | 5 | 5 |
| 5 | 5 | 5 | 5 | 5 | 5 | 5 | 5 | 5 |
| 4 | 4 | 4 | 4 | 4 | 4 | 4 | 4 | 4 |
| 4 | 5 | 5 | 5 | 5 | 5 | 5 | 5 | 5 |
| 4 | 4 | 4 | 4 | 4 | 4 | 4 | 4 | 4 |
| 4 | 3 | 4 | 4 | 5 | 4 | 4 | 4 | 4 |
| 4 | 4 | 4 | 4 | 4 | 4 | 4 | 4 | 5 |
| 4 | 4 | 4 | 4 | 4 | 4 | 4 | 5 | 5 |
| 5 | 5 | 5 | 5 | 5 | 5 | 5 | 5 | 5 |
| 4 | 5 | 5 | 5 | 5 | 5 | 5 | 5 | 5 |
| 5 | 5 | 5 | 5 | 5 | 5 | 5 | 5 | 5 |
| 4 | 4 | 4 | 4 | 4 | 4 | 4 | 4 | 4 |
| 4 | 4 | 5 | 4 | 4 | 5 | 4 | 5 | 4 |
| 3 | 3 | 5 | 3 | 5 | 3 | 5 | 5 | 5 |

| BI1 | BI2 | BI3 |
|-----|-----|-----|
| 4   | 4   | 4   |
| 4   | 5   | 4   |
| 4   | 4   | 5   |
| 4   | 4   | 4   |
| 4   | 4   | 5   |
| 5   | 5   | 5   |
| 4   | 4   | 4   |
| 5   | 5   | 4   |
| 4   | 4   | 4   |
| 4   | 3   | 4   |
| 5   | 5   | 4   |
| 4   | 4   | 4   |
| 4   | 4   | 4   |
| 2   | 4   | 2   |
| 4   | 4   | 4   |
| 4   | 3   | 3   |
| 4   | 5   | 5   |
| 5   | 5   | 5   |
| 4   | 4   | 4   |
| 4   | 4   | 4   |
| 4   | 4   | 4   |
| 4   | 4   | 4   |
| 2   | 4   | 3   |
| 4   | 4   | 4   |
| 5   | 5   | 4   |
| 4   | 3   | 4   |
| 5   | 5   | 4   |
| 4   | 4   | 4   |
| 3   | 3   | 3   |
| 4   | 4   | 4   |
| 2   | 4   | 2   |
| 4   | 4   | 4   |
| 4   | 4   | 3   |
| 4   | 4   | 4   |
| 4   | 4   | 4   |
| 5   | 5   | 4   |
| 4   | 3   | 3   |
| 2   | 2   | 2   |
| 5   | 4   | 4   |
| 4   | 4   | 4   |
| 4   | 4   | 4   |
| 4   | 5   | 5   |
| 5   | 5   | 5   |
| 4   | 4   | 4   |
| 5   | 5   | 5   |
| 4   | 4   | 4   |
| 4   | 4   | 4   |

|   |   |   |
|---|---|---|
| 5 | 5 | 5 |
| 4 | 4 | 4 |
| 5 | 5 | 5 |
| 4 | 4 | 4 |
| 3 | 3 | 3 |
| 3 | 3 | 4 |
| 4 | 4 | 4 |
| 5 | 5 | 5 |
| 5 | 5 | 5 |
| 3 | 3 | 3 |
| 4 | 4 | 4 |
| 4 | 5 | 5 |
| 5 | 5 | 5 |
| 5 | 5 | 5 |
| 3 | 3 | 3 |
| 5 | 5 | 5 |
| 4 | 4 | 4 |
| 4 | 4 | 5 |
| 5 | 5 | 5 |
| 4 | 4 | 4 |
| 5 | 5 | 5 |
| 4 | 4 | 4 |
| 4 | 4 | 4 |
| 4 | 4 | 4 |
| 4 | 5 | 5 |
| 4 | 4 | 4 |
| 5 | 5 | 4 |
| 5 | 5 | 5 |
| 4 | 4 | 4 |
| 5 | 5 | 4 |
| 5 | 5 | 5 |
